# Supplementary material for: Relationship between 4-Hydroxynonenal (4-HNE) as Systemic Biomarker of Lipid Peroxidation and Metabolomic Profiling of Patients with Prostate Cancer
Source: MDPI journal article supplement (doi:10.3390/biom13010145), 2023-01-10
Supplement: s1 [file s1]

## Supplementary materials

**Table S1.** Clinical features of the patients with prostate cancer involved in the study and 4-HNE immunohistochemistry results obtained.

| Patient number | Age | PSA*  | Cancer stage**         | 4-HNE in cancer cells*** | 4-HNE in stroma | 4-HNE in blood vessels |
|----------------|-----|-------|------------------------|--------------------------|-----------------|------------------------|
| 1              | 63  | 5.82  | GS 3+4=7(pT2c+N0MX).   | 0                        | 1               | 1                      |
| 2              | 64  | 5.22  | GS 3+4=7(pT2c N0MX).   | 0                        | 0               | 0                      |
| 3              | 57  | 6.3   | GS 3+4=7(pT3aN0MxR+).  | 0                        | 0               | 0                      |
| 4              | 64  | 4.96  | GS 3+3=6(pT2cNoMX R+). | 0                        | 0               | 0                      |
| 5              | 57  | 7.4   | GS 4+3=7(pT2a NoMX).   | 0                        | 0               | 0                      |
| 6              | 62  | 12    | GS 3+4=7pT(m)2cN0MXR+  | 0                        | 0               | 0                      |
| 7              | 59  | 4.03  | GS 4+3=7pT2cN0Mx       | 0                        | 0               | 0                      |
| 8              | 62  | 41    | GS 3+4=7pT2cN0MxR+     | 0                        | 0               | 0                      |
| 9              | 74  | 4.6   | GS4+3=7 pT2aN0Mx       | 0                        | 0               | 0                      |
| 10             | 64  | 5.3   | GS 3+4=7 (pT2c N0MX).  | 0                        | 0               | 0                      |
| 11             | 62  | 7     | GS 3+4=7 (pT2c N0MX).  | 0                        | 0               | 0                      |
| 12             | 68  | 8.33  | GS 3+4=7 (pT2c N0MX).  | 0                        | 0               | 0                      |
| 13             | 70  | 5.67  | GS 3+4=7 (pT2c N0MX).  | 0                        | 0               | 0                      |
| 14             | 67  | 5.21  | GS 3+4=7 (pT3aN0MxR1). | 0                        | 0               | 0                      |
| 15             | 66  | 4.79  | GS 3+4=7(pT2cN0MxR0).  | 0                        | 0               | 0                      |
| 16             | 69  | 25.12 | GS 4+3=7 (pT2cN0Mx)    | 0                        | 0               | 0                      |
| 17             | 62  | 8.7   | GS 3+4=7 pT3aN0MxR+)   | 0                        | 0               | 0                      |
| 18             | 61  | 9.78  | GS 3+5=8 pT3bN1MxR+)   | 0                        | 0               | 0                      |
| 19             | 60  | 8.67  | GS 3+4=7 pT2aN0Mx      | 0                        | 0               | 0                      |
| 20             | 61  | 8.97  | GS 3+4=7 (pT2c N0MX).  | 0                        | 0               | 0                      |
| 21             | 61  | 5.4   | GS 3+4=7 (pT2c N0MX).  | 0                        | 0               | 0                      |
| 22             | 63  | 5.79  | GS 3+4=7 (pT2c N0MX).  | 0                        | 0               | 0                      |
| 23             | 68  | 4     | GS 3+4=7 (pT2c N0MX).  | 0                        | 0               | 0                      |
| 24             | 64  | 12.7  | GS 3+3=6 (pT2c N0MX).  | 0                        | 0               | 0                      |
| 25             | 64  | 7.08  | GS 3+4=7 (pT2N0Mx)     | 0                        | 0               | 0                      |
| 26             | 67  | 8     | GS 3+4=7 (pT2c N0MX).  | 0                        | 0               | 0                      |
| 27             | 64  | 4.25  | GS 3+4=7 (pT2c N0MX).  | 0                        | 0               | 0                      |
| 28             | 50  | 3.5   | GS 3+4=7 (pT2N0Mx)     | 0                        | 0               | 0                      |
| 29             | 56  | 8.6   | GS 4+4=8 (pT3bN0Mx)    | 0                        | 0               | 0                      |
| 30             | 65  | 6.2   | GS 3+4=7 (pT2c NxMX).  | 0                        | 0               | 0                      |

\* PSA values determined for the blood samples collected before surgery (ng/mL)

\*\* G=Gleason values of tumor differentiation summarizing values of two respective cancer areas, pTNM – as determined by pathohistology does not reflect possible remote metastases

\*\*\* Immunohistochemical findings of 1 means low incidence of HNE-immunopositivity, while 0 means no positivity at all

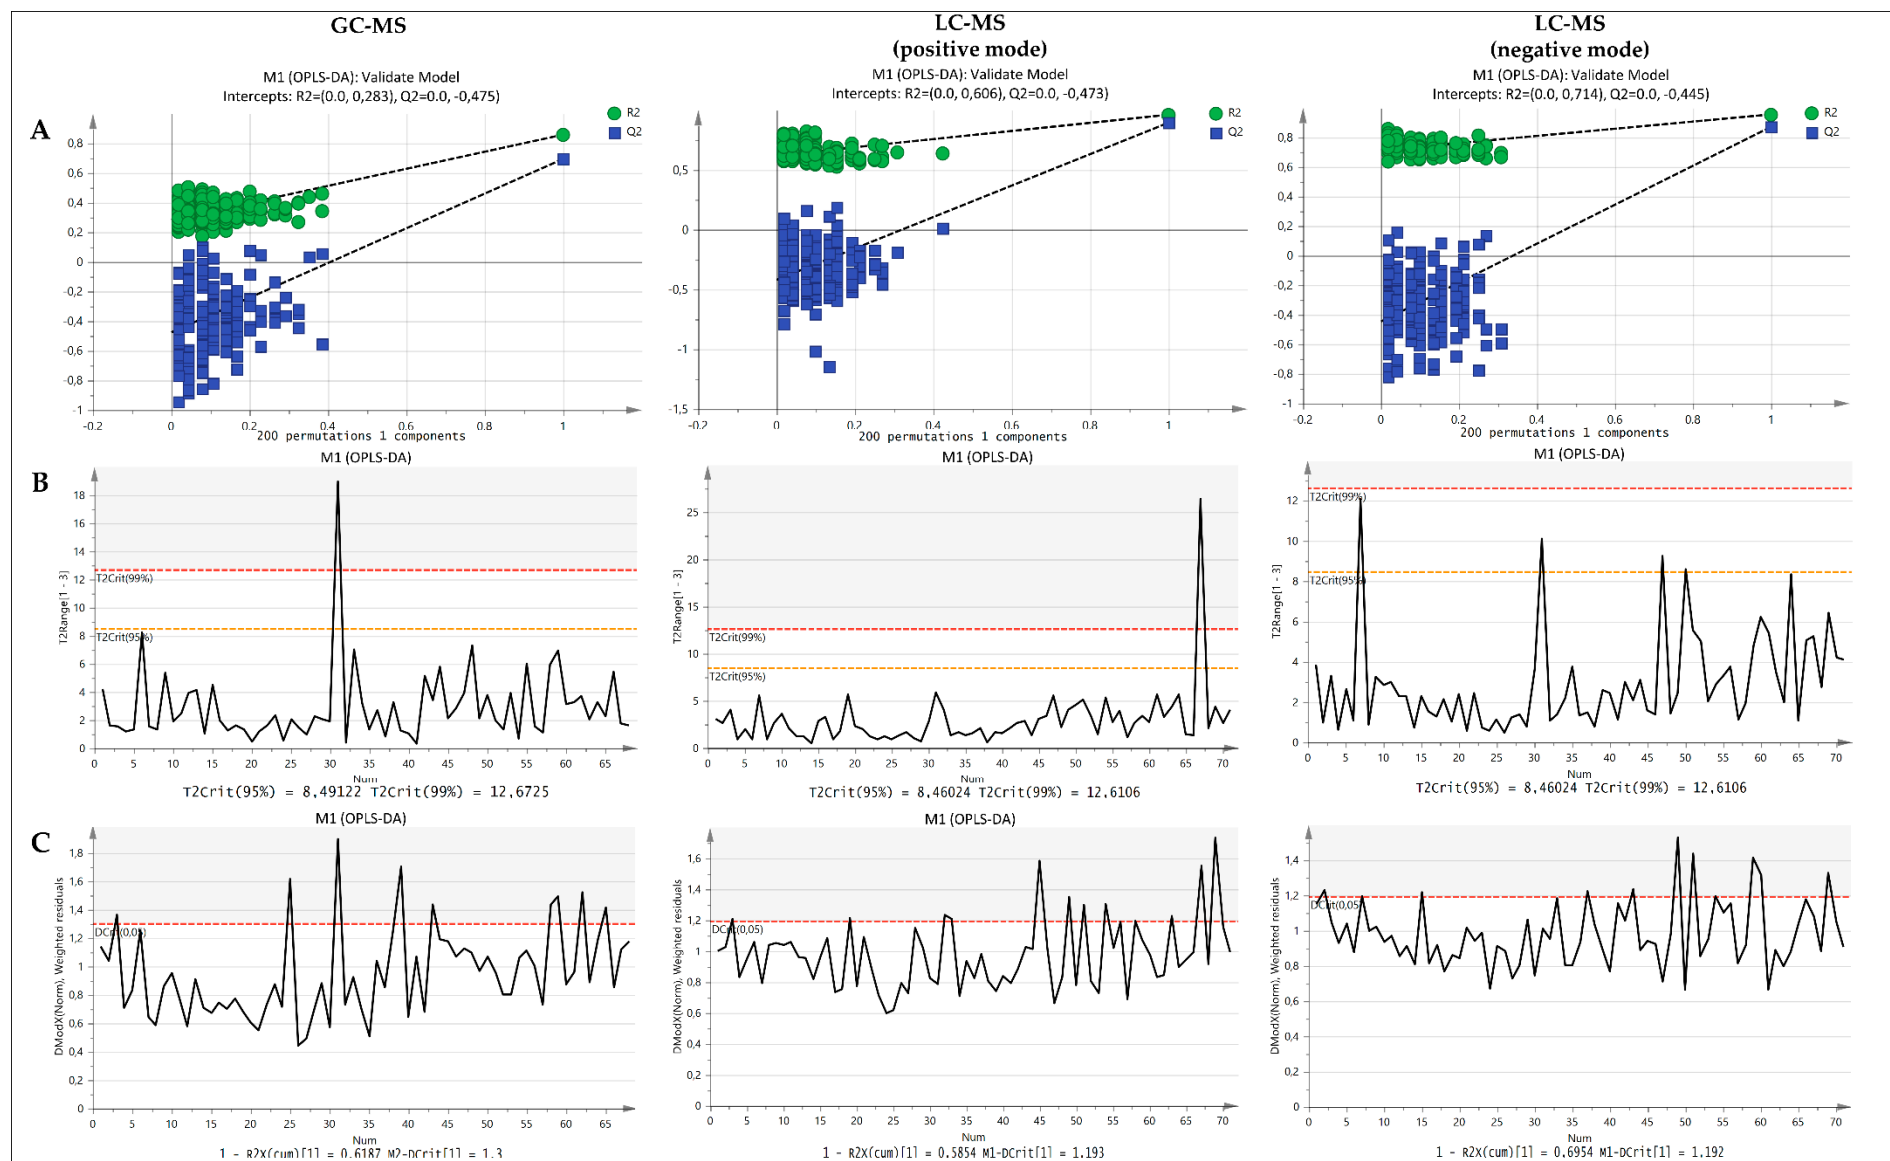

**Figure S1.** Validity tests for OPLS-DA models. Plots were obtained using SIMCA-P+ software (version 15.0.2.5959, Umetrics, Umea, Sweden).

(A) Permutation analysis plotting  $R^2$  and  $Q^2$  from 200 permutation tests in the OPLS-DA model. The y-axis shows  $R^2$  and  $Q^2$  and the x-axis shows the correlation coefficient of permuted and observed data. The two points on the right represent the observed  $R^2$  (green point) and  $Q^2$  (blue point). Cluster of points on the left represents 200 permuted  $R^2$ s (green points) and  $Q^2$ s (blue points). Dashed lines mark corresponding fitted regression lines for the observed and the permuted  $R^2$  and  $Q^2$ ; (B) Hotelling's  $T^2$  line plot. The plot displays the distance from the origin in the model plane (score space) for each selected observation. The plot shows the  $T^2$  calculated for the range of selected components. Red and orange horizontal dashed line denotes 99% and 95% CI level. Values larger than the 95% confidence limit are suspect, and values larger than the 99% confidence limit can be considered as serious; (C) DModX test plot. DModX is the distance of an observation in the training set to the X model plane or hyper plane. DModX is proportional to the residual standard deviation (RSD) of the X observation. Observations with a DModX twice as large as  $D_{crit}$  (critical value of  $D_{crit}$ ) are moderate outliers.
